# Microtubule-mitochondrial attachment facilitates cell division symmetry and proper mitochondrial partitioning in fission yeast

Leeba Ann Chacko<sup>1,2</sup>, Felix Mikus<sup>3,4</sup>, Nicholas Ariotti<sup>5</sup>, Gautam Dey<sup>3</sup>, and Vaishnavi Ananthanarayanan<sup>1,2</sup> ✉

<sup>1</sup>Centre for BioSystems Science and Engineering, Indian Institute of Science, Bengaluru, India

<sup>2</sup>Current affiliation: EMBL Australia Node in Single Molecule Science, School of Biomedical Sciences, University of New South Wales, Sydney, Australia

<sup>3</sup>Cell Biology and Biophysics Unit, European Molecular Biology Laboratory, Heidelberg, Germany

<sup>4</sup>Collaboration for joint PhD degree between EMBL and Heidelberg University, Faculty of Biosciences

<sup>5</sup>Institute for Molecular Bioscience, University of Queensland, Brisbane, Australia

**Association with microtubules inhibits the fission of mitochondria in *Schizosaccharomyces pombe*. Here we show that this attachment of mitochondria to microtubules is an important cell intrinsic factor in determining division symmetry. By comparing mutant cells that exhibited enhanced attachment and no attachment of mitochondria to microtubules (*Dnm1*Δ and *Mmb1*Δ respectively), we show that microtubules in these mutants displayed aberrant dynamics compared to wild-type cells, which resulted in errors in nuclear positioning. This translated to cell division asymmetry in a significant proportion of both *Dnm1*Δ and *Mmb1*Δ cells. Asymmetric division in *Dnm1*Δ and *Mmb1*Δ cells resulted in unequal distribution of mitochondria, with the daughter cell that received more mitochondria growing faster than the other daughter. Taken together, we show the existence of homeostatic feedback controls between mitochondria and microtubules in fission yeast, which directly influence mitochondrial partitioning and thereby, cell growth.**

**Keywords:** Microtubules; mitochondria; cell division; mitochondrial partitioning

**Correspondence:** [vaish@unsw.edu.au](mailto:vaish@unsw.edu.au)

## Introduction

Symmetric cell division is the hallmark of most eukaryotic cells. Fission yeast (*Schizosaccharomyces pombe*) is a rod-shaped, unicellular eukaryote that divides symmetrically during mitosis (1). A single cell grows by polarised tip extension from about 7μm to 14μm in length. Once the cell has grown to 14μm in length, it ceases to grow and proceeds to divide by assembling an actomyosin contractile ring at the geometrical centre of the cell (2, 3). Subsequently, the two daughter cells formed post mitosis are of equal length. Due to their ability to divide medially and produce identically-sized daughter cells, fission yeast is a powerful tool in cell cycle research.

One of the key players involved in ensuring symmetric division in fission yeast has been identified to be the microtubule (MT) cytoskeleton (4). A typical fission yeast cell contains an average of three to five MT bundles that emanate in the perinuclear region from the centrosome (spindle pole body in yeast) or other interphase MT organising centres (iMTOCs) (5), and are positioned along the long axis of the cell (6). MTs in *S. pombe* can crossbridge with the nuclear envelope (6), and iMTOCs themselves are thought to interact with

the nuclear envelope (4). The pushing forces of the individual bundles growing against the cell periphery in an interphase cell ensure the medial placement of the nucleus (4). This medial placement enables positioning of the division plane at the centre of the cell (7). As a result, attenuating the dynamics of MTs causes severe cell division defects.

Contrary to their depiction in textbooks, mitochondria are not discrete, static entities, but rather a network of tubules that are in an equilibrium between fission and fusion. This balance between fission and fusion is essential for proper mitochondrial function, with dysfunction being associated with several cellular metabolic defects (8). The dynamin-related GTPase Drp1 (*Dnm1* in yeast) is the major mitochondrial fission protein, whereas two sets of GTPases *Mfn1/2* and *Opa1* bring about fusion of the outer membrane and inner membrane of the mitochondria respectively (9–11). *Dnm1* is cytosolic but assembles as rings around the mitochondrial outer membrane and undergoes GTP hydrolysis to effect constriction and eventual scission of mitochondria (12, 13). In the absence of *Dnm1*, mitochondria exist as a single, long network that spans the entire cell, but remains attached to the MT (14).

In fission yeast, mitochondria are bound to MTs via the linker protein *Mmb1* (15). Recently, we showed that the absence of *Mmb1* results in mitochondrial fragmentation due to the inability of *Dnm1* to assemble around mitochondria bound to MTs (16). In cells with shorter MTs than normal, we observed several shorter mitochondria, whereas in cells with longer MTs than wild-type (WT), we observed fewer, longer mitochondria. Importantly, the total mitochondrial volume between the WT cells and mutant strains with shorter or longer MTs was conserved, indicating that the predominant result of altered MT dynamics was a change in mitochondrial morphology. We therefore established a causal link between MT dynamics and mitochondrial morphology (16).

In this work, we explore the outcome of altered mitochondrial form, and thereby their attachment to MTs in context of cell division. We observed that both *Dnm1*Δ and *Mmb1*Δ cells displayed increased asymmetric cell division. We set out to investigate the mechanism by which alteration of mitochondrial form resulted in these cellular homeostasis defects.

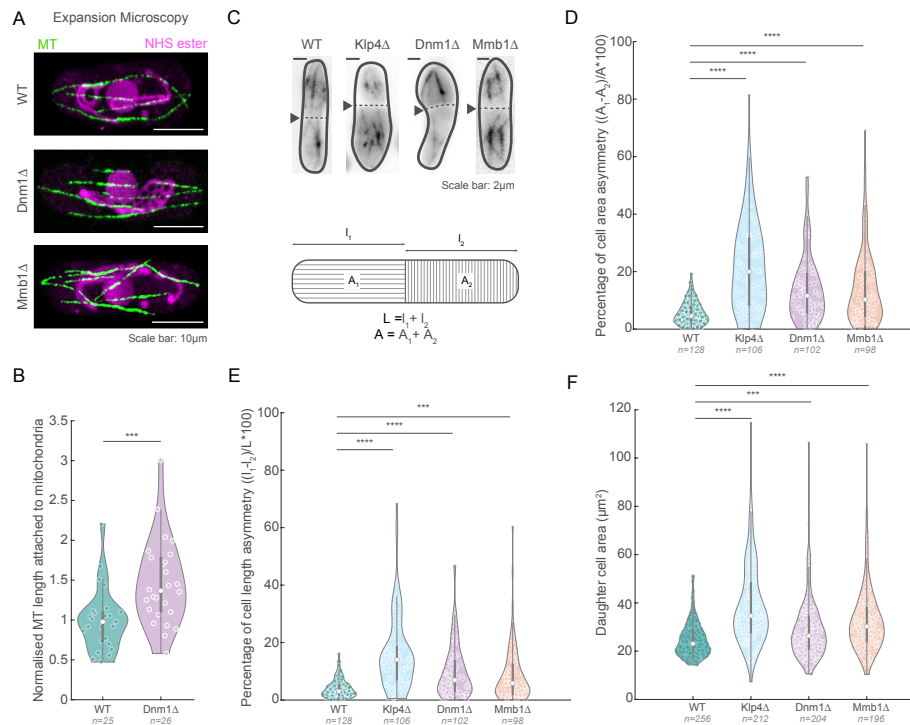

**Fig. 1. Dnm1 $\Delta$  and Mmb1 $\Delta$  cells exhibit increased asymmetric cell division.** **A**, Spinning disk confocal microscopy images of MTs (green) and NHS ester (magenta) in ultrastructure-expanded WT, Dnm1 $\Delta$  and Mmb1 $\Delta$  cells (strains L972, Dnm1 $\Delta$  and VA078, see Table S1). The NHS ester non-specifically labels protein density, particularly the mitochondria and nucleus, as seen in these cells. **B**, Quantification of MT length attached to mitochondria in WT and Dnm1 $\Delta$  cells normalised to the mean of WT cells. Note that Mmb1 $\Delta$  cells do not show attachment between MTs and mitochondria. **C**, Maximum intensity projected images of MTs in WT, Klp4 $\Delta$ , Dnm1 $\Delta$  and Mmb1 $\Delta$  (strains L972, FY7143, KI001, G5B, Dnm1 $\Delta$  and VA069, see Table S1), with the cell division plane (dashed line) indicated with the black arrowheads (top), and schematic of the method employed to measure cell length and area asymmetries (bottom). **D**, Plot of asymmetry in cell areas between the daughter cells in WT, Klp4 $\Delta$ , Dnm1 $\Delta$  and Mmb1 $\Delta$  cells. **E**, Plot of asymmetry in cell lengths between the daughter cells in WT, Klp4 $\Delta$ , Dnm1 $\Delta$  and Mmb1 $\Delta$  cells. **F**, Plot of daughter cell area in WT, Klp4 $\Delta$ , Dnm1 $\Delta$  and Mmb1 $\Delta$  cells. In **B**, the asterisks represent significance (\*\* =  $p < 10^{-3}$ , student's T-test). In **D**, **E** and **F**, the asterisks represent significance (\*\*\*\* =  $p < 10^{-4}$  and \*\*\* =  $p < 2 \times 10^{-4}$  respectively), Kruskal-Wallis test for non-parametric data.

## Results

### Dnm1 $\Delta$ and Mmb1 $\Delta$ exhibit asymmetry during cell division.

Cells lacking the mitochondrial fission protein Dnm1 contain a single long mitochondrial network ((14), Fig S1A). This long mitochondrion was attached to MTs along the length of the cell, such that when MTs were depolymerised using MBC (methyl-2-benzimidazole-carbamate), we observed retraction of the mitochondrial network (Fig. S1B, Video S1). This evinced that there was an enhanced attachment of mitochondria to MTs in Dnm1 $\Delta$  cells. On the other hand, cells lacking the mitochondria-MT linker protein Mmb1 do not associate with MTs (15). We confirmed these observations by visualising MTs and mitochondria in ultrastructure-expanded images (17) of WT, Dnm1 $\Delta$  and Mmb1 $\Delta$  cells (1A, Video S2), and indeed quantified higher rates of attachment of mitochondria to MTs in Dnm1 $\Delta$  cells compared to WT cells (1B). In our previous work, we showed that this dissociation of mitochondria from MTs results in fragmentation of the mitochondrial network (Fig. S1A, (16)). When we followed dividing Dnm1 $\Delta$  and Mmb1 $\Delta$  cells, we observed that cells exhibited ~15% asymmetry in both cell length and cell area during division, compared to a median of ~5% asymmetry in WT cells (Fig. 1C-E, S1C). Accordingly, the daughter cells in Dnm1 $\Delta$  and Mmb1 $\Delta$  background were also distributed across a larger range of areas than the WT

cells (Fig. 1F). This degree of asymmetry during division is significantly higher than WT cells but slightly lower compared to the phenotype in Klp4 $\Delta$  (MT-stabilising kinesin-like protein (18), Fig. 1), Pom1 $\Delta$  (polarity-determining protein kinase (19), Fig. S1D, E) which have been well-established to exhibit asymmetry in division. Cells lacking the heteromeric kinesin-8 Klp5/6 have longer MTs and mitochondria than WT (16), and therefore also have increased attachment of mitochondria to MTs. Klp5/6 $\Delta$  cells also showed increased asymmetric division compared to WT cells (Fig. S1D, E).

We asked if the asymmetry could have arisen due to defects in mitochondrial function in the mutant cells. To answer this question, we quantified the proportion of asymmetry in dividing *rho*<sup>0</sup> cells. *S. pombe* cells are petite negative and as such, these *rho*<sup>0</sup> cells have an additional nuclear mutation to grow in the absence of mtDNA (20, 21). These *rho*<sup>0</sup> cells rely primarily on glycolysis for ATP production, and therefore grow slower on fermentable carbon sources (20). We did not observe significant differences in cell division asymmetry between WT and *rho*<sup>0</sup> cells (Fig. S1D, E). Mitochondrial form is also linked to reactive oxygen species (ROS) levels, with fragmented mitochondria producing increased ROS and fused mitochondria producing reduced ROS (22). However, from previous work, we did not see a difference in mitochon-

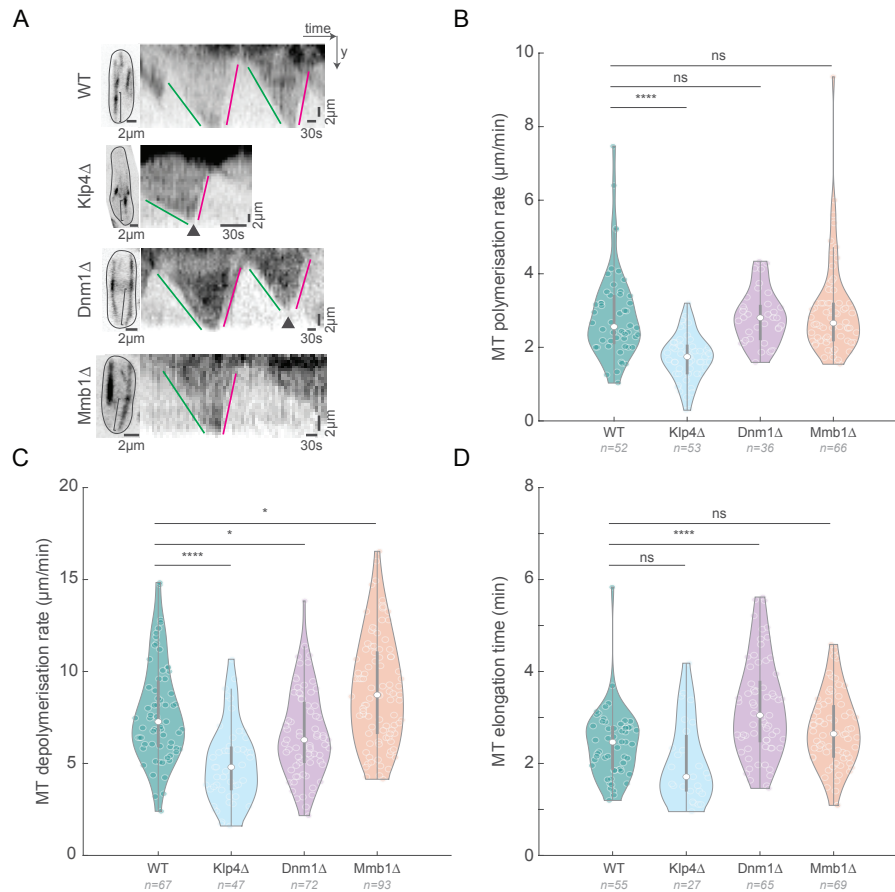

**Fig. 2. MT depolymerisation rate is aberrant in Dnm1Δ and Mmb1Δ cells.** **A**, Maximum intensity-projected images (left) of MTs from the first frame of time-lapse videos of representative WT, Klp4Δ, Dnm1Δ and Mmb1Δ cells (strains VA112, G5B, VA110 and VA113, see Table S1), and the corresponding kymographs (right) of the MTs indicated with the square brace. Green lines indicate MT polymerisation, magenta lines indicate MT depolymerisation and the arrowheads point to catastrophe events. **B**, Plot of MT polymerisation rates in WT, Klp4Δ, Dnm1Δ and Mmb1Δ cells (mean ± S.D.:  $2.9 \pm 1.2$ ,  $1.7 \pm 0.6$ ,  $2.8197 \pm 0.7$ , and  $3.0 \pm 1.3$  μm/min respectively). **C**, Plot of MT depolymerisation rates in WT, Klp4Δ, Dnm1Δ and Mmb1Δ cells (mean ± S.D.:  $7.8 \pm 2.7$ ,  $5.0 \pm 2.1$ ,  $6.7 \pm 2.3$ , and  $9.0 \pm 2.9$  μm/min respectively). **D**, Plot of MT elongation times in WT, Klp4Δ, Dnm1Δ and Mmb1Δ cells (mean ± S.D.:  $2.4 \pm 0.7$ ,  $2.0 \pm 0.9$ ,  $3.2 \pm 1.1$ , and  $2.7 \pm 0.8$  min respectively). The reciprocal of the MT elongation time gives the MT catastrophe rate. In **B**, **C** and **D**, the asterisks represent significance (\*\*\*\* =  $p < 10^{-4}$  and \* =  $p < 11 \times 10^{-3}$  respectively), and 'ns' indicates no significant difference using Kruskal-Wallis test for non-parametric data and ordinary one-way ANOVA for parametric data.

134 drial ROS in mutants with altered mitochondrial morphology 154  
 135 (16). So too, transformation of Dnm1Δ cells with Dnm1 155  
 136 restored mitochondrial form (16) and also symmetry in daugh- 156  
 137 ter cell length during division (Fig. S1C, D). 157

138 **Microtubule dynamics are altered in mitochondrial** 159  
 139 **morphology mutants.** Nuclear positioning in *S. pombe* is 160  
 140 effected by pushing forces of growing MTs against the cell 161  
 141 poles (4). Due to the paired anti-parallel nature of MT bun- 162  
 142 dles in fission yeast (5, 6), this translates to net equal forces 163  
 143 on either side of the cell. Therefore, the nucleus largely re- 164  
 144 mains in the centre of the cell and this central location of the 165  
 145 nucleus is essential in dictating the future cell division plane. 166  
 146 Fission yeast MT mutants, such as Klp4Δ and Klp5/6Δ, have 167  
 147 altered MT dynamics, and therefore mis-center the nucleus, 168  
 148 leading to a significant increase in asymmetrically dividing 169  
 149 cells (Figs. 1C-E, S1C-E). We asked whether Dnm1Δ and 170  
 150 Mmb1Δ cells displayed asymmetry in cell division due to 171  
 151 altered MT dynamics. Mmb1Δ cells have been described 172  
 152 to have more dynamic MTs than WT cells, and cells over- 173  
 153 expressing Mmb1 exhibit more stable MTs (15). So too, 174

Dnm1Δ cells required a higher concentration of the MT- 154  
 155 depolymerising drug TBZ to completely abrogate MTs (14), 156  
 157 indicating higher MT stability. We measured the MT poly- 158  
 159 merisation rate, depolymerisation rate and MT elongation 160  
 161 time in WT, Klp4Δ, Dnm1Δ and Mmb1Δ cells (Fig. 2A), 162  
 163 and observed that MTs in Dnm1Δ cells had reduced depoly- 164  
 165 merisation rate (Fig. 2C) and increased elongation time (re- 166  
 167 duced catastrophe frequency) compared to WT cells (Fig. 168  
 169 2D). On the other hand, Mmb1Δ cells had MTs with in- 170  
 171 creased depolymerisation rate (Fig. 2C). As expected, Klp4Δ 172  
 173 cells exhibited reduced MT depolymerisation rate and poly- 174  
 175 merisation rate compared to WT cells (Fig. 2A, B and C). 176  
 177 These results indicated that the association of mitochondria 178  
 179 with MTs enhanced MT stability, whereas the lack of asso- 180  
 181 ciation reduced MT stability. We confirmed that these re- 182  
 183 sults were not an artefact of the levels of tubulin expression in 184  
 185 these cells by comparing the total intensity of tubulin among 186  
 187 the strains employed (Fig S2A). 188

**The nucleus is highly dynamic in mitochondrial mor-** 189  
**phology mutants.** Since the nuclear position prior to onset 190

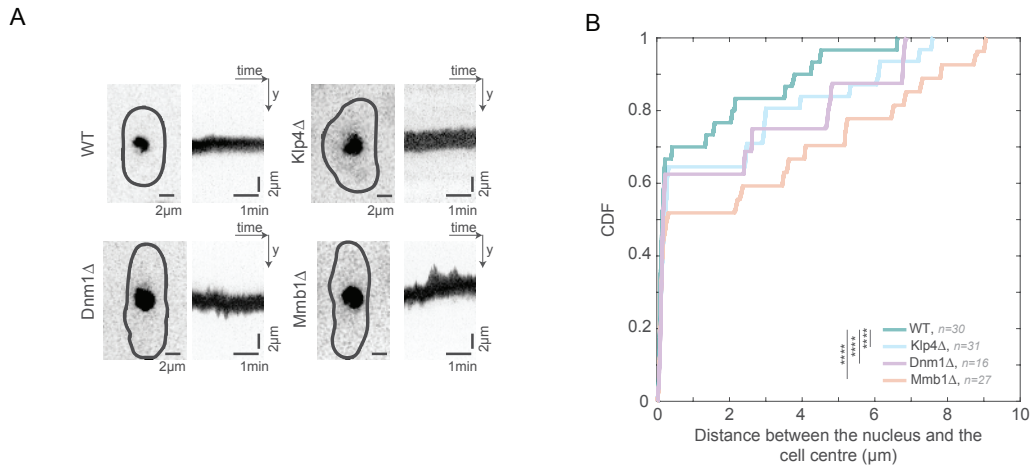

**Fig. 3. Dnm1Δ and Mmb1Δ cells exhibit enhanced nuclear movement.** **A**, Maximum intensity-projected images (left) of the nucleus from the first frame of time-lapse videos of representative WT, Klp4Δ, Dnm1Δ and Mmb1Δ cells (strains VA102, VA111, VA103 and VA104, see Table S1), and the corresponding kymographs (right) of the nuclear movement. **B**, Cumulative density function (CDF) of the distance of the nucleus from the cell centre for each time point of the time-lapse videos of nuclei in WT, Klp4Δ, Dnm1Δ and Mmb1Δ cells. The asterisks (\*\*\*\*) represent  $p < 10^{-4}$ , Kruskal-Wallis test for non-parametric data.

of mitosis determines the future site of division (4), we set out to ask if the altered MT dynamics in the mitochondrial morphology mutants changed the nuclear dynamics in these cells. We observed that unlike WT cells, the nucleus was highly dynamic in both Dnm1Δ and Mmb1Δ cells (Fig. 3A, Video S3). As a result, the excursions of the nucleus from the cell centre were significantly higher in Dnm1Δ and Mmb1Δ cells than in WT cells (Fig. 3B). We confirmed that the nucleus moved more as a result of the altered MT dynamics by visualising the nuclear dynamics in cells devoid of MT (Fig. S2B). As expected, we measured negligible movement of the nucleus in the absence of MTs. So too, the short MTs in Klp4Δ cells typically do not contact the cell end (16, 18) and therefore does not result in a pushing force to move the nucleus. This was reflected in the reduced movement of the nucleus (Fig. 3A, Video S3), and increased distance of the Klp4Δ nuclei from the cell centre (Fig. 3B). Occasionally, we observed Dnm1Δ and Mmb1Δ cells that had inherited few or no mitochondria from the mother cell. Remarkably, the nuclei in these cells exhibited dramatic movements, reiterating that MT instability could be effected by lack of mitochondrial attachment (Fig. S2C, D, Video S4).

**Mitochondrial partitioning is asymmetric in mitochondrial morphology mutants.** Next, we probed the consequence of asymmetric division of mutant cells on the partitioning of mitochondria. Mitochondria undergo independent segregation in fission yeast, with cell division symmetrically aiding the equitable partitioning of mitochondria between daughter cells (16). We measured the amount of mitochondria in dividing WT and mutant cells (Fig. 4A), and observed that mitochondria were partitioned in proportion to the cell area, indicating that independent segregation was still likely active in the mutants (Fig. 4B). However, since a significant proportion of cells underwent asymmetric division in the mutants, mitochondria were also partitioned unequally between daughter cells (Fig. 4C).

**Growth rate of cells scales with quantity of mitochondria inherited following cell division.** Finally, we tested the outcome of such asymmetric partitioning of mitochondria in Dnm1Δ cells that underwent asymmetric cell division. We observed that the smaller daughter, which received less mitochondria than the larger daughter, grew slower than the larger daughter cell (Fig. 5A, B, S2E, Video S5). In comparison, WT cells which show only a small degree of asymmetry in cell area (~5% on average) and therefore mitochondrial partitioning, still exhibited differences in growth rates between the two daughters (Fig. 5B).

We confirmed that the growth rates were proportional to the mitochondria inherited from the mother by quantifying the growth rates in symmetrically dividing cells that partitioned mitochondria asymmetrically. Such events are occasionally seen in Mmb1Δ cells (Fig. 5C, D, S2F, Video S6). We observed a linear relationship between mitochondrial inheritance at the time of birth and the growth rate (Fig. 5D), indicating a central role for mitochondria in determining dynamics of cell growth.

## Discussion

The interplay between mitochondria and MTs has been implicated in maintaining cellular homeostasis. Here, we first identified that alteration of mitochondrial form and thereby, attachment of mitochondria to MTs resulted in higher rates of incidence of asymmetry in typically symmetrically-dividing fission yeast cells. We showed that this asymmetry resulted from changes in MT depolymerisation rate and catastrophe frequency when the association of mitochondria to MTs was either enhanced or absent compared to WT cells. In metazoans, mitochondria rely on microtubules for their transport and positioning (23). Further, MTs in metazoans have been demonstrated to effect changes in gene expression owing to their link with the nuclear membrane via the LINC (linker of nucleoskeleton and cytoskeleton) complex (24). It would be interesting to see if a change in mitochondrial form or at-

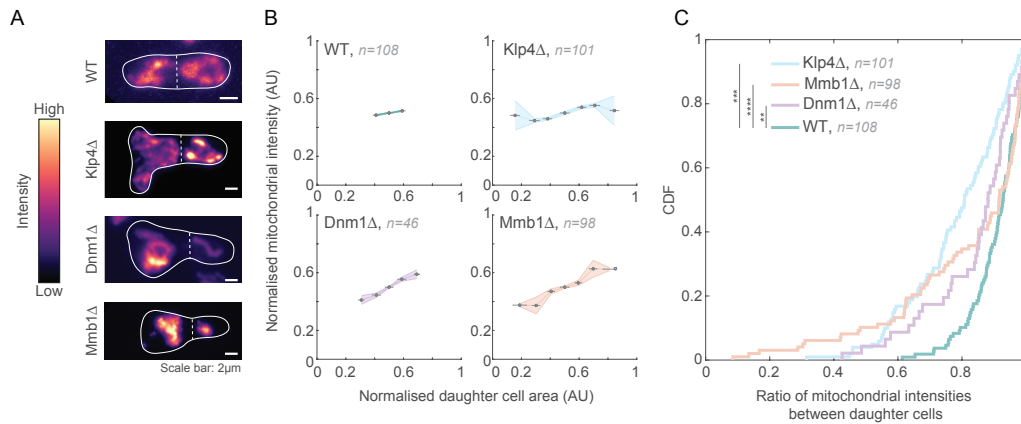

**Fig. 4. Mitochondria are asymmetrically partitioned in Dnm1Δ and Mmb1Δ cells.** **A**, Maximum intensity-projected images of mitochondria in WT, Klp4Δ, Dnm1Δ and Mmb1Δ cells (strains KI001, G5B, VA069 and PT2244, see Table S1). Warmer colours indicate higher intensities. The cell outlines are indicated with the solid white line and the septum between the daughter cells is the dashed white line. **B**, Plots of normalised mitochondrial intensity (sum intensity) vs. normalised cell area in WT, Klp4Δ, Dnm1Δ and Mmb1Δ cells. **C**, CDF of ratio of mitochondrial intensities between daughter cells in WT, Klp4Δ, Dnm1Δ and Mmb1Δ cells. The asterisks represent significance (\*\*\*\* =  $p < 10^{-21}$ , \*\*\* =  $p < 10^{-10}$  and \*\* =  $p < 3 \times 10^{-6}$  respectively) using Levene's Test for equality of variances.

246 tachment to MTs has a similar effect on MT dynamics, and 283  
247 therefore cell fate in metazoans. 284

248 The endoplasmic reticulum (ER), another prominent or- 285  
249 ganelle in most cells, has been recently shown to have a me- 286  
250 chanical role in controlling MT organisation in mammalian 287  
251 cells (25), and in constraining spindle lengths in *Drosophila* 288  
252 syncytial embryos (26), providing additional evidence for 289  
253 general organelle-mediated MT regulation. In *S.pombe*, the 290  
254 ER is not known to directly associate with MTs. How- 291  
255 ever, there may be indirect links between these two com- 292  
256 ponents via the ER mitochondria encounter structures (ER- 293  
257 MES), which regulate mitochondrial form and biogenesis 294  
258 (27). 295

259 The perturbation of MT dynamics in fission yeast mu- 296  
260 tants with altered mitochondrial form resulted in increased 297  
261 nuclear movements, which gave rise to nuclear positioning 298  
262 that was offset from the cell centre. Since fission yeast relies 299  
263 on the nuclear position prior to mitosis to dictate the eventual 300  
264 cell division plane, mutants with altered mitochondrial form 301  
265 exhibited more instances of asymmetric cell division com-  
266 pared to WT cells.

267 Fission yeast as well as other metazoans have been doc- 302  
268 umented to follow independent segregation to partition mi- 303  
269 tochondria among daughter cells during mitosis (16, 28). In- 304  
270 dependent segregation relies on the presence of a large 'copy 305  
271 number' of mitochondria present in the mother cell so as 306  
272 to reduce the partitioning error (29). Given large enough 307  
273 copy numbers of mitochondria, positioning the division plane 308  
274 roughly at the cell centre ensures equitable distribution of 309  
275 mitochondria in daughter cells. In Mmb1Δ and Dnm1Δ 310  
276 cells, due to the asymmetry observed in a significant propor- 311  
277 tion of cells, mitochondrial partitioning between the daugh- 312  
278 ters though equitable, resulted in cells with very few mito- 313  
279 chondria compared to the rest of the population. These cells 314  
280 that contained fewer mitochondria grew slower, and therefore 315  
281 would likely be out-competed by other cells. However, be-  
282 cause the reduction in mitochondria resulted from altered MT

283 dynamics, asymmetric cell division and thereby again daugh-  
284 ter cells with fewer mitochondria, would persist in future di-  
285 vision cycles. Dnm1Δ cells have previously been shown to  
286 have retarded growth rates (30), which could be partially at-  
287 tributed to the unequal partitioning of mitochondria following  
288 asymmetric cell division in a significant proportion of these  
289 cells.

## 290 Conclusion

291 In conclusion, MT dynamics and mitochondrial form and at-  
292 tachment were found to be fine-tuned to be in a 'Goldilocks  
293 zone' in fission yeast whereby symmetric cell division could  
294 be achieved. Any deviation from this narrow range resulted in  
295 asymmetric cell division. Additionally, cellular homeostasis  
296 relied on the feedback between MTs and mitochondria, with  
297 the mitochondria dictating its own partitioning via changes  
298 in its form. In future, it will be interesting to understand the  
299 fate of cells that inherited fewer mitochondria, and if simi-  
300 lar feedback mechanisms exist between the cytoskeleton and  
301 other intracellular compartments.

## 302 Materials and Methods

303 **Strains and media.** The fission yeast strains used in this  
304 study are listed in Table S1. All the strains were grown in  
305 yeast extract medium or Edinburgh minimal medium (EMM)  
306 with appropriate supplements at a temperature of 30°C (1).

307 **Construction of strains.** Strain VA064 was constructed by  
308 transforming Dnm1Δ with pREP41-Dnm1 (Dnm1 untagged  
309 plasmid). Similarly, strain VA102 was constructed by cross-  
310 ing PT1650 (h+ cox4-GFP:leu1 ade6-M210 ura4-D18; see  
311 Table S1) with JCF4627 (h- ade6-M210 leu1-32 ura4-D18  
312 his3-D1 hht1-mRFP-hygMX6; see Table S1) while strain  
313 VA103 was constructed by crossing VA077 (h- dnm1::kanr  
314 leu1-32ade-(ura+)cox4-GFP:leu1 ade6-M210 leu1-32 ura4-  
315 D18; see Table S1) with VA101 (h+ hht1-mRFP-hygMX6

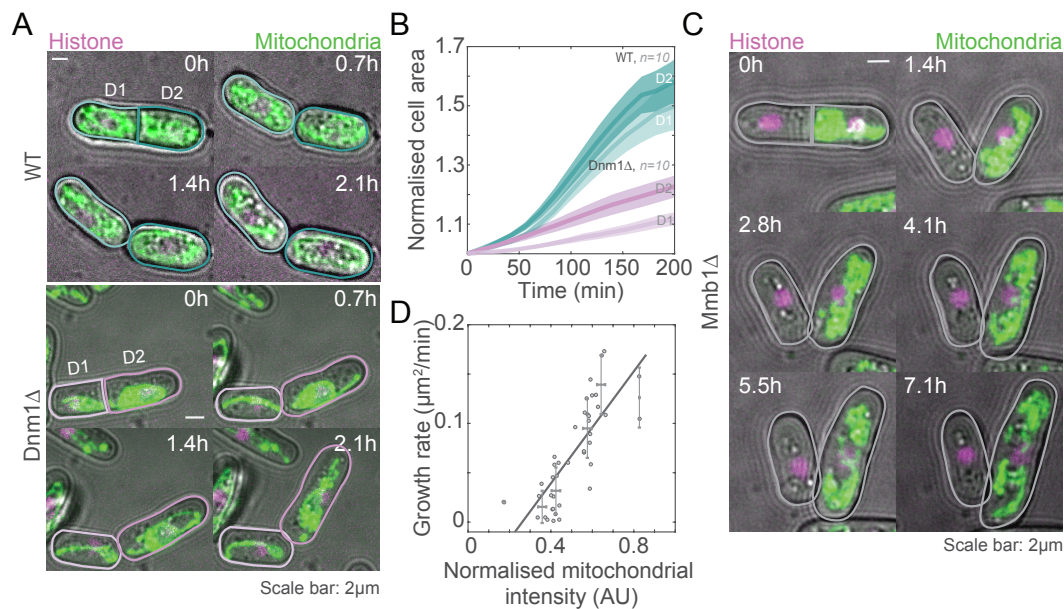

**Fig. 5. Mitochondrial content at cell birth determines growth rate.** **A**, Montage of maximum intensity-projected images of mitochondria (green) and histone (magenta) in a representative WT cell (top, strain VA102, see Table S1) and Dnm1 $\Delta$  cell (bottom, strain VA103, see Table S1) undergoing asymmetric cell division and mitochondrial partitioning. D1 is the smaller daughter cell, and D2, the larger daughter cell. **B**, Plot of change in cell area of D1 and D2 cells vs. time normalised to the first time frame upon division of the cells. 10 D1-D2 pairs were analysed for WT and Dnm1 $\Delta$  cells (strains VA102 and VA103, see Table S1). **C**, Montage of maximum intensity-projected images of mitochondria (green) and histone (magenta) in a representative Mmb1 $\Delta$  cell (strain VA104, see Table S1) with symmetric cell division but asymmetric mitochondrial partitioning. **D**, Plot of growth rate vs. mitochondrial intensities in 21 Mmb1 $\Delta$  daughter cell pairs that underwent <20% asymmetric cell division. The black line is a weighted linear fit (of the form  $y = mx + c$ ), and yielded  $R^2 = 0.81$ .

316 *cox4-GFP::leu1 ade6-M210 leu1-32 ura4-D18*; see Table 345  
 317 S1). Strain VA104 was constructed by crossing VA080 346  
 318 (*h- mmb1 $\Delta$ :Kanr cox4-GFP::leu2 mCherry-atb2:Hygr ade6-* 347  
 319 *m210 leu1-32 ura4-d18*; see Table S1) with VA101 (*h+ hht1-* 348  
 320 *mRFP-hygMX6 cox4-GFP::leu1 ade6-M210 leu1-32 ura4-*  
 321 *D18*; see Table S1). Strain VA110 was constructed by 349  
 322 crossing VA109 (*h+ dnm1 $\Delta$ ::kanr leu1-32ade-(ura+)* *ura4-* 350  
 323  *$\Delta$ 18 leu1::GFP-atb2::ura4+*; see Table S1) with JCF4627 351  
 324 (*h- ade6-M210 leu1-32 ura4-D18 his3-D1 hht1-mRFP-* 352  
 325 *hygMX6*). Strain VA111 was constructed by crossing VA102 353  
 326 (*h- hht1-mRFP-hygMX6 cox4-GFP::leu1 ade6-M210 leu1-* 354  
 327 *32 ura4-D18*; see Table S1) with MCI438 (*h+ tea2d::his3 ade6* 355  
 328 *leu1-32 ura4-D18 his3-D1*; see Table S1). Strain VA112 356  
 329 was constructed by crossing JCF4627 (*h- ade6-M210 leu1-* 357  
 330 *32 ura4-D18 his3-D1 hht1-mRFP-hygMX6*; see Table S1) 358  
 331 with VA106 (*h+ ura4- $\Delta$ 18 leu1::GFP-atb2::ura4+*; see Ta- 359  
 332 ble S1). Strain VA113 was constructed by crossing VA112 360  
 333 (*h+ hht1-mRFP-hygMX6 ura4- $\Delta$ 18 leu1::GFP-atb2::ura4+* 361  
 334 *ade6-M210 leu1-32 his3-D1*; see Table S1) with VA078 (*h+* 362  
 335 *mmb1 $\Delta$ :Kanr*; see Table S1).

336 **Plasmid transformation.** Transformation of strains was 365  
 337 carried out using the improved protocol for rapid transfor- 366  
 338 mation of fission yeast as described previously (16). 367

339 **Preparation of yeast for imaging.** For imaging, fission 369  
 340 yeast cells were grown overnight in a shaking incubator 370  
 341 at 30°C. The following day, the cells were sub-cultured 371  
 342 into fresh medium for 2 h at 30°C to achieve an optical 372  
 343 density (OD) of 0.3-0.4 (mid-log phase). Following this, 373  
 344 cells were washed once with distilled water and thrice with 374

EMM. The cells were then allowed to adhere on lectin-coated 923  
 (Sigma-Aldrich, catalog number L2380) 35-mm confocal 924  
 dishes (SPL Life Sciences, cat. number 100350) for 20 min. 925  
 Unattached cells were removed by washing with EMM. 926

**Live-cell imaging.** Confocal microscopy was carried out in 927  
 Fig. 1A, 4A, S1B and S2C using the InCell Analyzer-6000 928  
 (GE Healthcare) with a 60x air objective 0.95 numerical 929  
 aperture (NA) objective fitted with an sCMOS camera. For GFP 930  
 and RFP imaging, 488 and 561 nm laser lines and 525/20 931  
 and 605/52 nm bandpass emission filters, respectively, were 932  
 used. Spinning disk confocal microscopy was carried out in 933  
 Fig. 2A, 3A and S1A using the Eclipse Ti2-E (Nikon) with 934  
 a 100 $\times$  oil-immersion 1.49 NA objective fitted with an EM- 935  
 CCD camera (iXon Ultra-897; Andor). For GFP and RFP 936  
 imaging, 488 and 561 nm laser lines (Toptica) and 525/20 937  
 and 605/52 nm bandpass emission filters, respectively, were 938  
 used.

Laser resonant scanning confocal microscopy was carried 939  
 out in Fig. 5A, 5C, using the Nikon A1 with a 60x, wa- 940  
 ter immersion, 1.2 NA objective fitted with GaAsP detectors. 941  
 For GFP and RFP imaging, 488 and 561 nm laser lines and 942  
 525/50 and 595/50 nm bandpass emission filters, respectively 943  
 with 405/488/561 dichroic, were used. 944

MT polymerisation, depolymerisation rates and MT piv- 945  
 otting in Fig. 2B was obtained by imaging Z-stacks (7 slices 946  
 with step size 1  $\mu$ m) acquired every 3 s for 5 min. MT elon- 947  
 gation times in Fig. 2D were imaged using Z-stacks (7 slices 948  
 with step size 1  $\mu$ m) acquired every 7 s for 10 min. Short term 949  
 nuclear dynamics in Fig. 3A were imaged using Z-stacks (7 950  
 slices with step size 1  $\mu$ m) acquired every 20 s for 20 min 951

375 while long-term nuclear dynamics in Fig. S2C were imaged 432  
376 using Z-stacks (5 slices with step size  $0.5 \mu\text{m}$ ) every 15 min-  
377 utes for 12 hours. MT depolymerisation in Fig. S1A was 433  
378 observed in time-lapse movies containing Z-stacks (5 slices 434  
379 with step size  $0.5 \mu\text{m}$ ) acquired every 12.5 s for 20 min. The 435  
380 growth rates of divided daughter cells in Fig. 5A and Fig. 5C 436  
381 was imaged with Z-stacks (13 slices with step size  $0.5 \mu\text{m}$ ) 437  
382 every 7 min for 10 h and 14 min for 12 h respectively. 438

383 **Ultrastructure expansion microscopy.** Ultrastructure ex- 439  
384 pansion microscopy was performed as described in (17), with 440  
385 some modification to the cell fixation. Briefly, cells were 441  
386 grown in YES at  $32^\circ\text{C}$  for 36 h, followed by high pres- 442  
387 sure freezing. Cultures were concentrated onto nitrocellulose 443  
388 membranes by vacuum filtration and frozen in  $200 \mu\text{m}$  alu- 444  
389 minium carriers at an ABRA HPM010. Freeze substitution 445  
390 was performed at  $-90^\circ\text{C}$  in acetone (Sigma, cet. No. 24201- 446  
391 M) and gradually warmed to room temperature at  $5^\circ\text{C}/\text{h}$ .  
392 Cells were subsequently rehydrated by successive washes  
393 with EtOH containing increasing amounts of  $\text{H}_2\text{O}$  (0%, 0%,  
394 5%, 5%, 25%, 50%, 100%, five minutes each) and stored un-  
395 til further use in PBS at  $4^\circ\text{C}$  ([https://doi.org/10.1038/s41592-](https://doi.org/10.1038/s41592-021-01356-4)  
396 [021-01356-4](https://doi.org/10.1038/s41592-021-01356-4)). For cell wall digestions, fixed cells were 447  
397 rinsed once in PEM buffer (100 mM PIPES, 1 mM EGTA and 448  
398  $\text{MgSO}_4$ , pH 6.9) and 2x in PEM containing 1.2 M sorbitol 449  
399 (PEMS) before incubating them in 2.5 mg/mL Zymolyase  
400 20T (Roth, cat.no. 9324.3) in PEMS at  $37^\circ\text{C}$  with agita- 450  
401 tion for 45 min. Cell wall digestion was confirmed with 451  
402 calcofluor white staining, and cells were then washed 3x in 452  
403 PEMS buffer. The resulting cell suspension was loaded onto 453  
404 a 12mm lysine-coated coverslip and processed for expansion. 454

405 The coverslips now containing fixed spheroplasts were 455  
406 incubated in protein crosslinking prevention solution (2% 456  
407 acrylamide (AA, Sigma, cat.no. A4058) / 1.4% formalde- 457  
408 hyde (Sigma, cat.no. F8775) in PBS) for 3 to 5h at  $37^\circ\text{C}$ . To 458  
409 the monomer solution (19% (wt/wt) sodium acrylate (Sigma, 459  
410 cat.no. 408220), 10% (wt/wt) AA, 0.1% (wt/wt)  $\text{N,N}'$ - 460  
411 methylenbisacrylamide (Sigma, cat.no. M1533) in 1X PBS), 461  
412 ammonium persulphate (ThermoFisher, cat.no. 17874) and 462  
413 tetramethylethylenediamine (ThermoFisher, cat.no. 17919)) 463  
414 were added to a final concentration of 0.5% each and the 464  
415 gelation was performed in a pre-cooled humid chamber on 465  
416 ice for 5 min and at  $37^\circ\text{C}$  for 1 h. The coverslips were then 466  
417 incubated in denaturation buffer (50 mM Tris pH 9, 200 mM 467  
418  $\text{NaCl}$ , and 200 mM SDS in water, pH 9) with agitation for 15 468  
419 min at room temperature. The formed gels were then trans- 469  
420 ferred to Eppendorf tubes containing denaturation buffer and 470  
421 incubated for 90 min at  $95^\circ\text{C}$  without agitation. Gels were ex- 471  
422 panded with 3x baths of ddH<sub>2</sub>O for 30 min at RT. After full 472  
423 expansion of the gel, the diameter of the gel was measured 473  
424 and proceed for immunostaining with NHS-ester diluted (at 474  
425  $2\mu\text{g}/\text{mL}$  in PBS over night at  $4^\circ\text{C}$ ) for visualisation of the 475  
426 general organisation of the cell (including mitochondria and 476  
427 the nucleus), and YL1/2 rat anti- $\alpha$ tubulin antibody (gift from 477  
428 Gislene Pereira) for visualisation of MTs. Expanded cells  
429 were then imaged using a spinning disk confocal microscope 478  
430 (Olympus IXplore SpinSR, with 0.95NA 40x air objective; 479  
431 Z-stacks spanning the entire cells were taken with  $0.3 \mu\text{m}$  480

step size.

**Image and data analysis.** Images were analysed using Fiji/ImageJ (31). Interphase cells that were used in our analyses had a mean length of  $10 \mu\text{m}$ . This mean length corresponds to cells in early-mid G2 phase in *S. pombe* (32).

For analysis of the length of MT that was attached to mitochondria in Fig. 1A, the colocalisation of MTs with mitochondria in WT and  $\text{Dnm1}\Delta$  in ultrastructure expanded cells was measured through the Z-stack containing the entire cell, and summed for each cell. The summed values were then normalised to the mean of the WT.

The MT polymerisation and depolymerisation rates were obtained by measuring the angle of the slopes ( $\theta$ ) from kymographs generated by drawing a line along a growing or shrinking MT and using the following formula:

$$\frac{x}{y} = \tan \theta \times \frac{\text{pixel size}}{\text{time interval (sec)}} \times 60$$

Where:

x: is the MT length in  $\mu\text{m}$

y: is the time in min

The MT elongation time was calculated from the kymograph by measuring the time from the onset of polymerisation to a catastrophe event. The rate of catastrophe was obtained from the reciprocal of the mean elongation time. The nuclear dynamics were obtained by thresholding the nucleus from time-lapse videos in ImageJ to obtain the nuclear centroid, and drawing an ROI around the cell perimeter to get the cell centroid. Then the euclidian distance between the 2 centroids was then calculated.

The nuclear velocity in Fig. S2D by measuring the euclidean distance between the nuclear positions in successive frames. MT pivoting was measured as the difference in the angle of the MT from one frame to another.

In Fig. 4B, mitochondrial intensities in daughter cells were normalised to total mitochondrial intensity of the mother, and similarly, area of the daughter cells was normalised to the total area of the mother cell just prior to division.

In Fig. 5A and S2E, the cell area is measured in each frame from the first to the last frame and all the cell areas are normalised to the cell area in the first frame.

In Fig. 5B and S2F, the normalised mitochondrial intensity represents the mitochondrial intensities of the daughter cells at birth divided by the mitochondrial intensity of the mother cell. The growth rate represents the rate of change of cell area between the first and last frames of the time-lapse images. Only cells with <20% asymmetry were used for quantification.

**Statistics and plotting.** Data were checked for normality using the chi2gof function in Matlab. Then, to test the statistical significance of the difference between distributions we

used ordinary one-way ANOVA or student's T-test for parametric data and Kruskal-Wallis test or Mann-Whitney test for non-parametric data. Equality of variance was compared using Levene's test. All plots were generated using Matlab (Mathworks Corp.). The figures were organised and prepared in Illustrator.

## Acknowledgements

We thank Ananya Rajagopal for help with construction of strains; the Katharina Gaus Light Microscopy Facility, UNSW; the High Content Imaging Facility, Centre for BioSystems Science and Engineering, Indian Institute of Science for the use of the InCell 6000 and spinning disk confocal microscopes; G. Redpath, N. Ul Fatima, A. Badrinarayanan, N. Dua, M. Rao and I. Jain for comments on the manuscript; P. Delivani (Max Planck Institute of Molecular Cell Biology and Genetics, Dresden, Germany), M. Takaine (Gunma University, Gunma, Japan), I. Tolić (Ruđer Bošković Institute, Zagreb, Croatia), P. Tran (University of Pennsylvania, Philadelphia, PA), T.D. Fox (Cornell University, Ithaca, NY), and National BioResource Project Japan for yeast strains and constructs. F. Mikus and G. Dey acknowledge the European Molecular Biology Laboratory for support.

## References

- Susan L. Forsburg and Nicholas Rhind. Basic methods for fission yeast. *Yeast (Chichester, England)*, 23:173, 2 2006. ISSN 0749503X. doi: 10.1002/YEA.1347.
- Mathieu Piel and Phong T. Tran. Cell shape and cell division in fission yeast minireview. *Current biology : CB*, 19:R823, 9 2009. ISSN 09609822. doi: 10.1016/J.CUB.2009.08.012.
- Ju Lee, Valerie C. Coffman, and Jian Qiu Wu. Contractile-ring assembly in fission yeast cytokinesis: Recent advances and new perspectives. *Cytoskeleton (Hoboken, N.J.)*, 69: 751, 10 2012. ISSN 19493584. doi: 10.1002/CM.21052.
- P. T. Tran, L. Marsh, V. Doye, S. Inoué, and F. Chang. A mechanism for nuclear positioning in fission yeast based on microtubule pushing. *The Journal of Cell Biology*, 153:397, 4 2001. ISSN 00219525. doi: 10.1083/JCB.153.2.397.
- Kenneth E. Sawin and P. T. Tran. Cytoplasmic microtubule organization in fission yeast. *Yeast*, 23(13):1001–1014, 2006. doi: <https://doi.org/10.1002/yea.1404>.
- Johanna L Höög, Cindi Schwartz, Angela T Noon, Eileen T O'Toole, David N Mastronarde, J Richard McIntosh, and Claude Antony. Organization of interphase microtubules in fission yeast analyzed by electron tomography. *Developmental cell*, 12(3):349–61, mar 2007. ISSN 1534-5807. doi: 10.1016/j.devcel.2007.01.020.
- Rafael R Daga and Fred Chang. Dynamic positioning of the fission yeast cell division plane. *Proceedings of the National Academy of Sciences of the United States of America*, 102: 8228–32, 6 2005. ISSN 0027-8424. doi: 10.1073/pnas.0409021102.
- Benedikt Westermann. Molecular machinery of mitochondrial fusion and fission. *The Journal of Biological Chemistry*, 283(20):13501–5, may 2008. ISSN 0021-9258. doi: 10.1074/jbc.R800011200.
- David C. Chan. Mitochondria: Dynamic Organelles in Disease, Aging, and Development. *Cell*, 125(7):1241–1252, 2006. ISSN 00928674. doi: 10.1016/j.cell.2006.06.010.
- Prashant Mishra and David C. Chan. Mitochondrial dynamics and inheritance during cell division, development and disease. *Nature Reviews Molecular Cell Biology*, 15(10):634–646, sep 2014. ISSN 1471-0072. doi: 10.1038/nrm3877.
- Benedikt Westermann. Bioenergetic role of mitochondrial fusion and fission. *Biochimica et Biophysica Acta (BBA) - Bioenergetics*, 1817(10):1833–1838, oct 2012. ISSN 00052728. doi: 10.1016/j.bbabi.2012.02.033.
- Elena Ingerman, Edward M Perkins, Michael Marino, Jason A Mears, J Michael McCaffery, Jenny E Hinshaw, and Jodi Nunnari. Dnm1 forms spirals that are structurally tailored to fit mitochondria. *Journal of Cell Biology*, 170(7):1021–1027, sep 2005. ISSN 1540-8140. doi: 10.1083/jcb.200506078.
- Jason A Mears, Laura L Lackner, Shunning Fang, Elena Ingerman, Jodi Nunnari, and Jenny E Hinshaw. Conformational changes in Dnm1 support a contractile mechanism for mitochondrial fission. *Nature Structural & Molecular Biology*, 18(1):20–26, jan 2011. ISSN 1545-9993. doi: 10.1038/nsmb.1949.
- Isabelle Jourdain, Yannick Gachet, and Jeremy S. Hyams. The dynamin related protein dnm1 fragments mitochondria in a microtubule-dependent manner during the fission yeast cell cycle. *Cell motility and the cytoskeleton*, 66:509–523, 8 2009. ISSN 1097-0169. doi: 10.1002/CM.20351.
- Chuanhai Fu, Deeptee Jain, Judite Costa, Guilhem Velve-Casquillas, and Phong T. Tran. Mmb1p binds mitochondria to dynamic microtubules. *Current Biology*, 21:1431–1439, 9 2011. ISSN 09609822. doi: 10.1016/j.cub.2011.07.013.
- K. Mehta, L.A. Chacko, M.K. Chug, S. Jhunjhunwala, and V. Ananthanarayanan. Association of mitochondria with microtubules inhibits mitochondrial fission by precluding assembly of the fission protein dnm1. *Journal of Biological Chemistry*, 294, 2019. ISSN 1083351X. doi: 10.1074/jbc.RA118.006799.
- Kerstin Hinterdorfer, Marine H Laporte, Felix Mikus, Lucas Tafur Petrozzi, Clélia Bourgoignie, Manoel Prouteau, Gautam Dey, Robbie Loewith, Paul Guichard, and Virginie Hamel. Ultrastructure expansion microscopy reveals the nanoscale cellular architecture of budding and fission yeast. *bioRxiv*, 2022. doi: 10.1101/2022.05.16.492060.
- Heidi Browning, Jacqueline Hayles, Juan Mata, Lauren Aveline, Paul Nurse, and J. Richard McIntosh. Tea2p is a kinesin-like protein required to generate polarized growth in fission yeast. *Journal of Cell Biology*, 151(1):15–27, oct 2000. ISSN 00219525. doi: 10.1083/jcb.151.1.15.
- Jürg Bähler and John R. Pringle. Pom1p, a fission yeast protein kinase that provides positional information for both polarized growth and cytokinesis. *Genes and Development*, 12(9):1356–1370, 1998. ISSN 08909369. doi: 10.1101/gad.12.9.1356.
- P Haffter and T D Fox. Nuclear mutations in the petite-negative yeast *Schizosaccharomyces pombe* allow growth of cells lacking mitochondrial DNA. *Genetics*, 131(2):255–60, 1992.
- Leeba Ann Chacko, Kritika Mehta, and Vaishnavi Ananthanarayanan. Cortical tethering of mitochondria by the anchor protein mcp5 enables uniparental inheritance. *The Journal of cell biology*, 218:3560–3571, 11 2019. ISSN 15408140. doi: 10.1083/jcb.201901108.
- O.Yu. Plejushkina, K.G. Lyamzaev, E.N. Popova, O.K. Nepryakhina, O.Yu. Ivanova, L.V. Domnina, B.V. Chernyak, and V.P. Skulachev. Effect of oxidative stress on dynamics of mitochondrial reticulum. *Biochimica et Biophysica Acta (BBA) - Bioenergetics*, 1757(5-6): 518–524, may 2006. ISSN 00052728. doi: 10.1016/j.bbabi.2006.03.018.
- Mitali Shah, Leeba Ann Chacko, Joel P. Joseph, and Vaishnavi Ananthanarayanan. Mitochondrial dynamics, positioning and function mediated by cytoskeletal interactions. *Cellular and Molecular Life Sciences*, feb 2021. ISSN 14209071. doi: 10.1007/s00018-021-03762-5.
- Mitra Shokrollahi and Karim Mekhail. Interphase microtubules in nuclear organization and genome maintenance. *Trends in Cell Biology*, 31(9):721–731, sep 2021. ISSN 0962-8924. doi: 10.1016/j.TCB.2021.03.014.
- Maria S. Tikhomirova, Avihay Kadosh, Aksel J. Saukko-Paavola, Tom Shemesh, and Robin W. Klemm. A role for endoplasmic reticulum dynamics in the cellular distribution of microtubules. *Proceedings of the National Academy of Sciences*, 119(15):e2104309119, 2022. doi: 10.1073/pnas.2104309119.
- Margarida Araújo, Alexandra Tavares, Diana V. Vieira, Ivo A. Telley, and Raquel A. Oliveira. Endoplasmic reticulum membranes are continuously required to maintain mitotic spindle size and forces. *bioRxiv*, page 2022.05.14.491942, 5 2022. doi: 10.1101/2022.05.14.491942.
- Faiz Rasul, Fan Zheng, Fenfen Dong, Jiajia He, Ling Liu, Wenyue Liu, Javairia Yousuf Cheema, Wenfan Wei, and Chuanhai Fu. Ern1 regulates the number of foci of the endoplasmic reticulum-mitochondria encounter structure complex. *Nature Communications* 2021 12:1, 12:1–14, 1 2021. ISSN 2041-1723. doi: 10.1038/s41467-020-20866-x.
- Elizabeth Lawrence and Craig Mandato. Mitochondrial inheritance is mediated by microtubules in mammalian cell division. *Communicative & integrative biology*, 6(6):e27557, nov 2013. ISSN 1942-0889. doi: 10.4161/cib.27557.
- Dann Huh and Johan Paulsson. Random partitioning of molecules at cell division. *Proceedings of the National Academy of Sciences of the United States of America*, 108(36): 15004–9, sep 2011. ISSN 1091-6490. doi: 10.1073/pnas.1013171108.
- Fenfen Dong, Mengdan Zhu, Fan Zheng, and Chuanhai Fu. Mitochondrial fusion and fission are required for proper mitochondrial function and cell proliferation in fission yeast. *The FEBS Journal*, 8 2021. ISSN 1742-464X. doi: 10.1111/febs.16138.
- Johannes Schindelin, Ignacio Arganda-Carreras, Erwin Frise, Verena Kaynig, Mark Longair, Tobias Pietzsch, Stephan Preibisch, Curtis Rueden, Stephan Saalfeld, Benjamin Schmid, Jean-Yves Tinevez, Daniel James White, Volker Hartenstein, Kevin Eliceiri, Pavel Tomancak, and Albert Cardona. Fiji: an open-source platform for biological-image analysis. *Nature Methods*, 9(7):676–682, jul 2012. ISSN 1548-7091. doi: 10.1038/nmeth.2019.
- Paul Nurse. Genetic control of cell size at cell division in yeast. *Nature*, 256(5518):547–551, aug 1975. ISSN 0028-0836. doi: 10.1038/256547a0.
